# Supplementary material for: Distinct Driver Pathway Enrichments and a High Prevalence of TSC2 Mutations in Right Colon Cancer in Chile: A Preliminary Comparative Analysis
Source: MDPI journal article supplement (doi:10.3390/ijms25094695), 2024-04-25
Supplement: s1 [file s1]

SUPPLEMENTARY MATERIAL TAPIA ET AL., 2014

| Table S1. Somatic mutations identified in actionable genes in Chilean patients diagnosed with colorectal cancer (CRC) |                                             |                  |               |
|-----------------------------------------------------------------------------------------------------------------------|---------------------------------------------|------------------|---------------|
| Gene                                                                                                                  | Frequency (N° of samples with the mutation) | ntChange (c.DNA) | aaChange (p.) |
| KRAS                                                                                                                  | 1                                           | T68G             | L23R          |
|                                                                                                                       | 1                                           | G38A             | G13D          |
|                                                                                                                       | 1                                           | G35C             | G12A          |
|                                                                                                                       | 1                                           | G34T             | G12C          |
|                                                                                                                       | 2                                           | G35A             | G12D          |
|                                                                                                                       | 6                                           | G35T             | G12V          |
|                                                                                                                       | 1                                           | G175A            | A59T          |
|                                                                                                                       | 1                                           | G274T            | D92Y          |
| NRAS                                                                                                                  | 1                                           | G178A            | G60R          |
| BRAF                                                                                                                  | 1                                           | C1750A           | L584I         |
|                                                                                                                       | 1                                           | G1405C           | G469R         |
|                                                                                                                       | 3                                           | T1799A           | V600E         |
| PMS2                                                                                                                  | 1                                           | G1640T           | C547F         |
|                                                                                                                       | 1                                           | G1585A           | E529K         |
|                                                                                                                       | 1                                           | T619C            | Y207H         |
|                                                                                                                       | 1                                           | C1553A           | S518Y         |
|                                                                                                                       | 1                                           | 460dupT          | S154fs        |
| MSH2                                                                                                                  | 1                                           | C1622T           | T541I         |
|                                                                                                                       | 1                                           | G680T            | R227I         |
|                                                                                                                       | 1                                           | A2495G           | E832G         |
|                                                                                                                       | 3                                           | G1738T           | E580X         |
| MSH6                                                                                                                  | 1                                           | T380C            | V127A         |
|                                                                                                                       | 1                                           | G280T            | E94X          |
|                                                                                                                       | 1                                           | G1055A           | R352Q         |
|                                                                                                                       | 1                                           | G475T            | A159S         |
|                                                                                                                       | 1                                           | G173A            | R58K          |
| PIK3CA                                                                                                                | 2                                           | G1633A           | E545K         |
|                                                                                                                       | 1                                           | G1030A           | V344M         |
|                                                                                                                       | 1                                           | G1624A           | E542K         |
|                                                                                                                       | 1                                           | 335_337del       | 112_113del    |
|                                                                                                                       | 1                                           | A1637G           | Q546R         |
|                                                                                                                       | 1                                           | G241A            | E81K          |
|                                                                                                                       | 1                                           | G278A            | R93Q          |
|                                                                                                                       | 1                                           | C3067T           | R1023X        |
|                                                                                                                       | 1                                           | A3140G           | H1047R        |
| TSC1                                                                                                                  | 1                                           | G2757T           | E919D         |
|                                                                                                                       | 1                                           | G530A            | R177Q         |
| TSC2                                                                                                                  | 1                                           | C4453T           | R1485C        |
|                                                                                                                       | 1                                           | C3857T           | S1286L        |
|                                                                                                                       | 1                                           | G496A            | E166K         |
|                                                                                                                       | 1                                           | C3619T           | R1207C        |
|                                                                                                                       | 1                                           | G233A            | R78H          |
|                                                                                                                       | 1                                           | 1359_1360del     | R453fs        |
| PTEN                                                                                                                  | 1                                           | G895T            | E299X         |
|                                                                                                                       | 1                                           | T299C            | L100P         |
|                                                                                                                       | 1                                           | G389A            | R130Q         |
|                                                                                                                       | 1                                           | 963delA          | T321fs        |
|                                                                                                                       | 1                                           | G21T             | E7D           |
|                                                                                                                       | 1                                           | G395A            | G132D         |
| MTOR                                                                                                                  | 2                                           | C6721T           | P2241S        |
|                                                                                                                       | 1                                           | A7498T           | I2500F        |
|                                                                                                                       | 1                                           | G4291A           | G1431R        |

**Table S2.** Comparison among Chp, MSK-IMPACT and TCGA cohorts.

| <b>Gene</b>   | <b>Chp<br/>(n = 40)</b> | <b>TCGA<br/>(n = 223)</b> | <b>MSK-IMPACT<br/>(n = 514)</b> | <b><i>p-value</i></b>          | <b>adj <i>p-value</i></b> |
|---------------|-------------------------|---------------------------|---------------------------------|--------------------------------|---------------------------|
| <i>TP53</i>   | 45% (18)                | 54.71% (122)              | 73.74% (379)                    | <b>1.698 x 10<sup>-6</sup></b> | 0.000044148               |
| <i>PMS2</i>   | 12.5% (5)               | 2.69% (6)                 | 1.56% (8)                       | <b>8.651 x 10<sup>-5</sup></b> | 0.001124630               |
| <i>TSC2</i>   | 15% (6)                 | 0.9% (2)                  | 5.25% (27)                      | <b>1.463 x 10<sup>-4</sup></b> | 0.001267933               |
| <i>PIK3CA</i> | 22.5% (9)               | 1.79% (40)                | 27.43% (141)                    | <b>2.153 x 10<sup>-2</sup></b> | 0.139945000               |
| <i>NRAS</i>   | 2.5% (1)                | 8.97% (20)                | 4.47% (23)                      | <b>3.563 x 10<sup>-2</sup></b> | 0.180050000               |
| <i>PTEN</i>   | 10% (4)                 | 4.93% (11)                | 10.7% (55)                      | <b>4.155 x 10<sup>-2</sup></b> | 0.180050000               |
| <i>ARID1A</i> | 17.5% (7)               | 9.87% (22)                | 16.34% (84)                     | 6.246 x 10 <sup>-2</sup>       | 0.219830000               |
| <i>KRAS</i>   | 30% (12)                | 43.05% (96)               | 47.67% (245)                    | 6.764 x 10 <sup>-2</sup>       | 0.219830000               |
| <i>CDK12</i>  | 10% (4)                 | 2.69% (6)                 | 4.47% (23)                      | 9.782 x 10 <sup>-2</sup>       | 0.256022000               |
| <i>POLE</i>   | 20% (8)                 | 9.42% (21)                | 9.53% (49)                      | 9.847 x 10 <sup>-2</sup>       | 0.256022000               |
| <i>CDKN2A</i> | 2.5% (1)                | 0.45% (1)                 | 2.72% (14)                      | 1.331 x 10 <sup>-1</sup>       | 0.314600000               |
| <i>MSH2</i>   | 10 % (4)                | 3.14% (7)                 | 44.44 (24)                      | 1.490 x 10 <sup>-1</sup>       | 0.314600000               |
| <i>FGFR3</i>  | 2.5% (1)                | 0.9% (2)                  | 3.31% (17)                      | 1.649 x 10 <sup>-1</sup>       | 0.314600000               |
| <i>NF1</i>    | 12.5% (5)               | 4.93% (11)                | 7.59% (39)                      | 1.694 x 10 <sup>-1</sup>       | 0.314600000               |
| <i>BRCA1</i>  | 7.5% (3)                | 2.69% (6)                 | 5.06% (26)                      | 2.338 x 10 <sup>-1</sup>       | 0.399329412               |
| <i>NTRK1</i>  | 7.5% (3)                | 2.69% (6)                 | 4.86% (25)                      | 2.542 x 10 <sup>-1</sup>       | 0.399329412               |
| <i>NTRK3</i>  | 0% (0)                  | 5.38% (12)                | 3.89% (20)                      | 2.611 x 10 <sup>-1</sup>       | 0.399329412               |
| <i>BRAF</i>   | 12.5% (5)               | 10.31% (23)               | 14.2% (73)                      | 3.519 x 10 <sup>-1</sup>       | 0.495778947               |
| <i>TSC1</i>   | 5% (2)                  | 18.18% (4)                | 3.5% (18)                       | 3.623 x 10 <sup>-1</sup>       | 0.495778947               |
| <i>FGFR1</i>  | 0% (0)                  | 18.18% (4)                | 2.92% (15)                      | 3.903 x 10 <sup>-1</sup>       | 0.507390000               |
| <i>RB1</i>    | 7.5% (3)                | 3.59% (8)                 | 5.45% (28)                      | 4.332 x 10 <sup>-1</sup>       | 0.536342857               |
| <i>FGFR2</i>  | 0% (0)                  | 2.69% (6)                 | 3.31% (17)                      | 4.742 x 10 <sup>-1</sup>       | 0.549956522               |
| <i>MLH1</i>   | 0% (0)                  | 3.59% (8)                 | 3.31% (17)                      | 4.865 x 10 <sup>-1</sup>       | 0.549956522               |
| <i>BRCA2</i>  | 12.5% (5)               | 9.87% (22)                | 12.65% (65)                     | 5.573 x 10 <sup>-1</sup>       | 0.603741667               |
| <i>MTOR</i>   | 10% (4)                 | 7.62% (17)                | 7.59% (39)                      | 8.575 x 10 <sup>-1</sup>       | 0.891800000               |
| <i>MSH6</i>   | 7.5% (3)                | 6.73% (15)                | 6.42% (33)                      | 9.588 x 10 <sup>-1</sup>       | 0.958800000               |

*\*p-value according to chi-square test. Significant values are in bold.*
